# Supplementary material for: The Insulin Receptor: A Potential Target of Amarogentin Isolated from Gentiana rigescens Franch That Induces Neurogenesis in PC12 Cells
Source: MDPI journal article supplement (doi:10.3390/biomedicines9050581), 2021-05-20
Supplement: s1 [file s1]

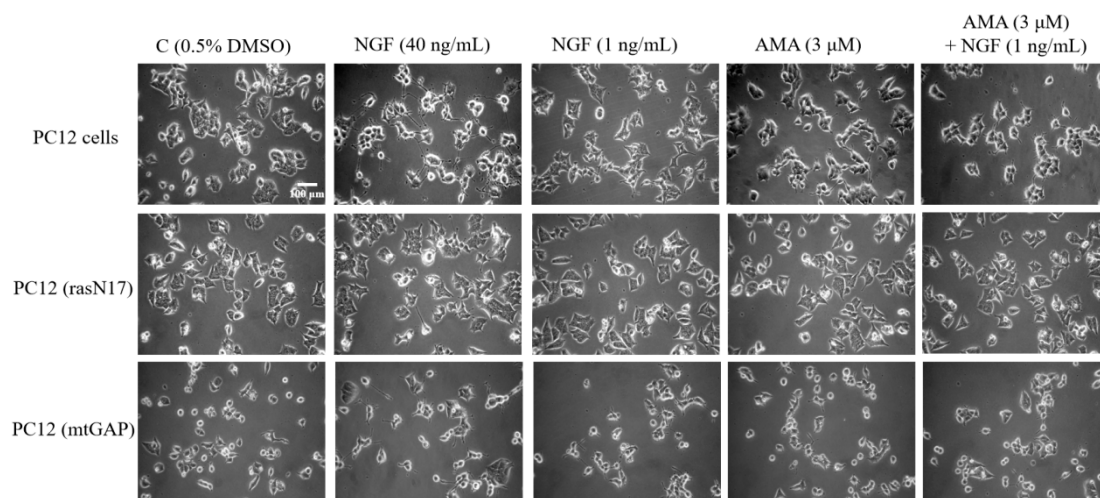

**Supplementary Figure 1.** Differentiation of PC12 cells expressing dominant negative Ras (PC12(rasN17)) or membrane-targeted GAP (PC12(mtGAP)) induced by AMA or AMA combined with NGF.

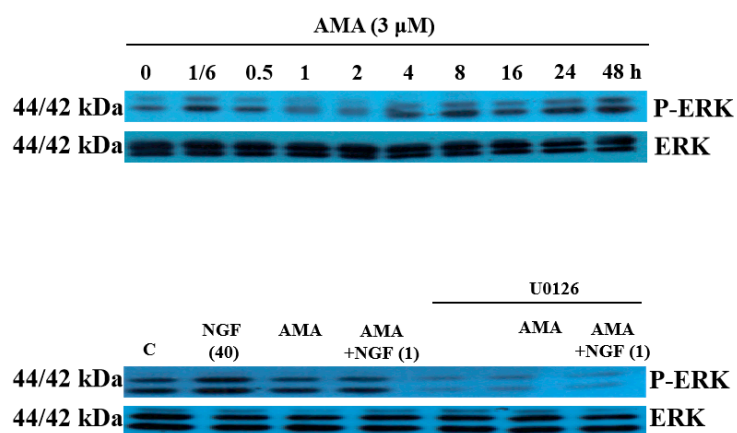

**Supplementary Figure 2.** Origin data of Western blot analysis in Figure 3g.

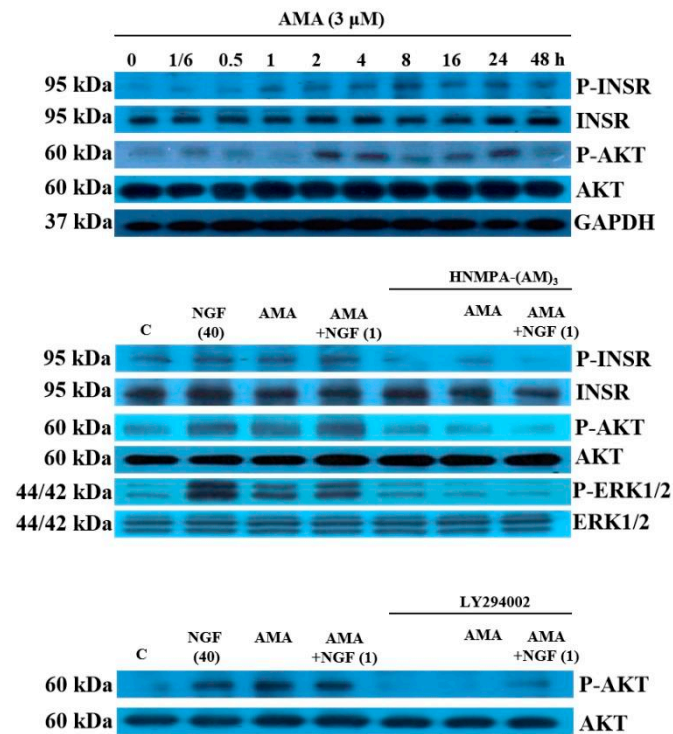

**Supplementary Figure 3.** Origin data of Western blot analysis in Figure 4c, 4d and 4e.

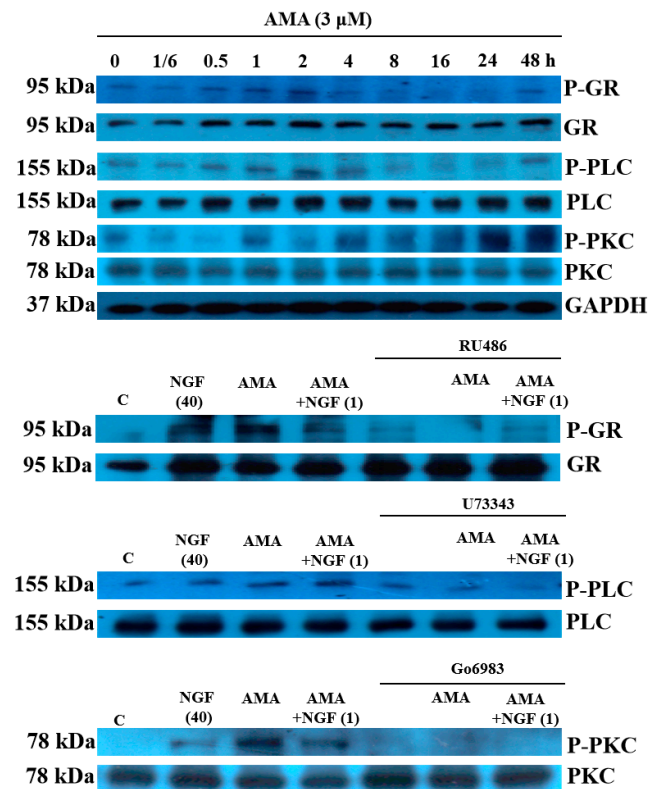

**Supplementary Figure 4.** Origin data of Western blot analysis in Figure 5d and 5e.

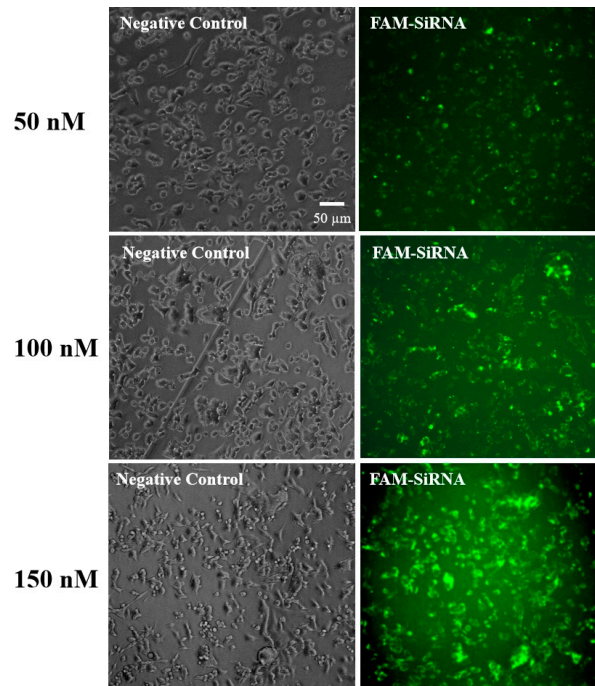

**Supplementary Figure 5.** Microphotograph of PC12 cells after transfection with different concentrations of FAM-siRNA (50 nM, 100 nM and 150 nM).

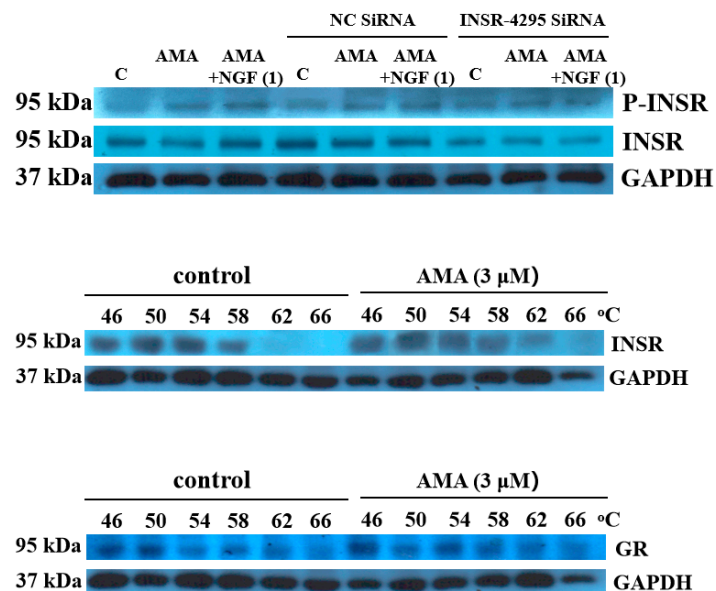

**Supplementary Figure 6.** Origin data of Western blot analysis in Figure 6c, 6d and 6e.

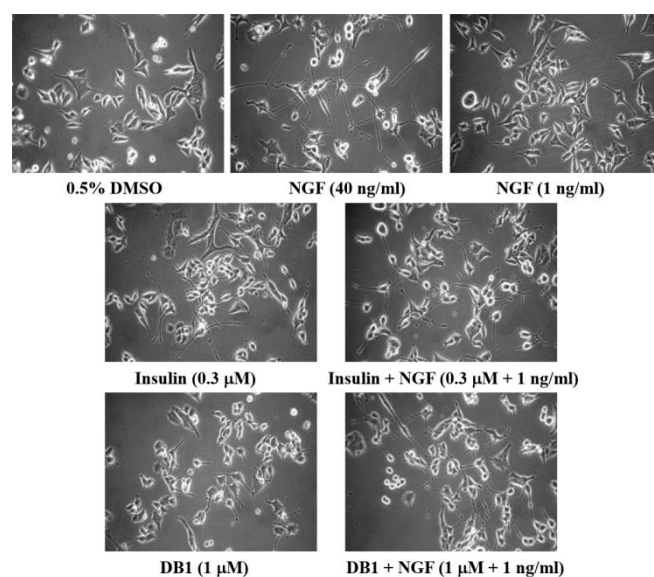

**Supplementary Figure 7.** Microphotograph of PC12 cells after treatment with insulin and Demethylasterriquinone B1.

**Supplementary Table 1.** List of inhibitors used in this study.

| Protein | Inhibitor                  | Product No.                          | Tested concentration |
|---------|----------------------------|--------------------------------------|----------------------|
| TrkA    | k252a                      | #82497, Sigma-Aldrich Co.            | 0.1 μM               |
| TrkB    | ANA-12                     | #S7745, Selleck                      | 1 μM                 |
| INSR    | HNMPA-[AM] <sub>3</sub>    | #sc-221730, Santa Cruz Biotechnology | 1 μM                 |
| GR      | RU486                      | #M8046, Sigma-Aldrich Co.            | 20 μM                |
| PI3K    | LY294002                   | #440202, Sigma-Aldrich Co.           | 10 μM                |
| MEK/ERK | U0126                      | #19-147, Sigma-Aldrich Co.           | 20 μM                |
| PLC     | U73343                     | #S8011, Selleck                      | 10 μM                |
| PKC     | Go6983                     | #G1918, Sigma-Aldrich Co.            | 1 μM                 |
| Ras     | farnesylthiosalicylic acid | #10010501, Cayman Chemical           | 3 μM                 |
| Raf     | AZ628                      | #sc-364418, Santa Cruz Biotechnology | 3 μM                 |

**Supplementary Table 2.** List of antibodies used in this study.

| Primary antibody                  | Product No.                      | Tested dilution of primary antibody | Secondary antibody                   | Tested dilution of secondary antibody |
|-----------------------------------|----------------------------------|-------------------------------------|--------------------------------------|---------------------------------------|
| Insulin receptor antibody         | #3025, Cell Signaling Technology | 1:1000                              | Goat Anti-Rabbit IgG, HRP Conjugated | 1:5000                                |
| Phospho-insulin receptor antibody | #3024, Cell Signaling Technology | 1:1000                              | Goat Anti-Rabbit IgG, HRP Conjugated | 1:5000                                |
| AKT antibody                      | #9272, Cell Signaling Technology | 1:1000                              | Goat Anti-Rabbit IgG, HRP Conjugated | 1:5000                                |
| Phospho-AKT antibody              | #4060, Cell Signaling Technology | 1:1000                              | Goat Anti-Rabbit IgG, HRP Conjugated | 1:5000                                |
| ERK1/2 antibody                   | #9102, Cell Signaling Technology | 1:1000                              | Goat Anti-Rabbit IgG, HRP Conjugated | 1:5000                                |
| Phospho-ERK1/2 antibody           | #9101, Cell Signaling Technology | 1:1000                              | Goat Anti-Rabbit IgG, HRP Conjugated | 1:5000                                |
| PLC antibody                      | #2822, Cell Signaling Technology | 1:1000                              | Goat Anti-Rabbit IgG, HRP Conjugated | 1:5000                                |
| Phospho-PLC $\gamma$ antibody     | #2821, Cell Signaling Technology | 1:1000                              | Goat Anti-Rabbit IgG, HRP Conjugated | 1:5000                                |
| PKC antibody                      | #ab181558, Abcam                 | 1:1000                              | Goat Anti-Rabbit IgG, HRP Conjugated | 1:5000                                |
| Phospho-PKC antibody              | #9371, Cell Signaling Technology | 1:1000                              | Goat Anti-Rabbit IgG, HRP Conjugated | 1:5000                                |
| GR antibody                       | #sc-393232, Santa Cruz           | 1:1000                              | Goat Anti-Mouse IgG, HRP Conjugated  | 1:5000                                |
| Phospho-GR antibody               | #AF2004, Affinity BioReagents    | 1:1000                              | Goat Anti-Rabbit IgG, HRP Conjugated | 1:5000                                |
| GAPDH Mouse Monoclonal Antibody   | #CW0100, Cowin Biotech Company   | 1:1000                              | Goat Anti-Mouse IgG, HRP Conjugated  | 1:5000                                |
